# Supplementary material for: Public health triangulation: approach and application to synthesizing data to understand national and local HIV epidemics
Source: Springer Nature journal article supplement (doi:10.1186/1471-2458-10-447), 2010-07-29
Supplement: 12889_2010_2358_MOESM1_ESM.pdf [file 12889_2010_2358_MOESM1_ESM.pdf]

**Box 2. The public health triangulation process.**

1. Identify key questions
2. Ensure question(s) are important, actionable, answerable and appropriate for triangulation
3. Identify data sources and gather background information
4. Refine the questions
5. Gather data/reports
6. Assess data reliability and make observations from each data set
7. Note trends across data sets and hypothesize
8. Check (corroborate, refute, modify) hypotheses
9. If necessary, identify additional data and return to Step 5
10. Summarize findings and draw conclusions
11. Communicate results and recommendations
12. Outline next steps for public health action
