# Supplementary material for: Public health triangulation: approach and application to synthesizing data to understand national and local HIV epidemics
Source: Springer Nature journal article supplement (doi:10.1186/1471-2458-10-447), 2010-07-29
Supplement: 12889_2010_2358_MOESM2_ESM.pdf [file 12889_2010_2358_MOESM2_ESM.pdf]

### Box 3. Criteria for a question answerable by public health triangulation

|                          |                                                                                                                                                                                                                                                                                            |
|--------------------------|--------------------------------------------------------------------------------------------------------------------------------------------------------------------------------------------------------------------------------------------------------------------------------------------|
| Public health importance | Is the question being asked of sufficient public health importance to justify the investment of human resources and funding? [e.g., should a question regarding the impact of rare injection drug use in an African country be pursued or one focused on much more prevalent alcohol use?] |
| Actionable               | Will answering the question being asked lead to the initiation of a public health action? Will the risk factors we identify be modifiable and amendable to public health interventions?                                                                                                    |
| Data availability        | Are there data available that have asked the right questions and provide answers on the different steps in the sequence of events that leads to a public health outcome?                                                                                                                   |
| Appropriateness          | Can the question be answered with conventional research methods or with a single available data set? Is a proposed intervention sufficiently new and unique that it should be evaluated by a different methodology?                                                                        |
| Feasibility              | Are there sufficient human resources and funding available to gather and analyze the data? Unless sufficient resources are available, searching for data and conducting the multiple levels of analysis needed for triangulation may be inadequate.                                        |
