# Supplementary material for: Public health triangulation: approach and application to synthesizing data to understand national and local HIV epidemics
Source: Springer Nature journal article supplement (doi:10.1186/1471-2458-10-447), 2010-07-29
Supplement: 12889_2010_2358_MOESM3_ESM.pdf [file 12889_2010_2358_MOESM3_ESM.pdf]

**Box 4. Criteria for ranking data sources.**

| <b>Data type</b>                               | <b>Criteria</b>                                                                                                                                                                                                                                                                                                                                                                                                                                                                                                                                                        |
|------------------------------------------------|------------------------------------------------------------------------------------------------------------------------------------------------------------------------------------------------------------------------------------------------------------------------------------------------------------------------------------------------------------------------------------------------------------------------------------------------------------------------------------------------------------------------------------------------------------------------|
| <b>Program data</b>                            | <ul style="list-style-type: none"> <li>• Uniform data collection and reporting tool used?</li> <li>• Frequency and timeliness of reporting</li> <li>• Adherence to a standard operating procedure for data management?</li> <li>• Data coverage (Number of sites included in the reporting system/total number of sites offering services)</li> <li>• Sample size (patient, client, or product (i.e. condoms))</li> </ul>                                                                                                                                              |
| <b>Surveillance data (ANC, DHS, BSS, etc.)</b> | <ul style="list-style-type: none"> <li>• Representativeness of sample for the target population (probability based?)</li> <li>• Implementation (implemented according to protocol)</li> <li>• Strength of the measures (biomarkers, self report, detailed behavioral indicators, knowledge)</li> <li>• Analysis (appropriate, complete, methods detailed)</li> <li>• Frequency and timeliness of data collection and reporting</li> <li>• Consistency of sites/locations and populations measured over time</li> <li>• Sample size</li> <li>• Response rate</li> </ul> |
| <b>Special studies (qualitative)</b>           | <ul style="list-style-type: none"> <li>• Sampling strategy explained in detail</li> <li>• Interview/observation methods described in detail</li> <li>• Implementation (methods implemented according to protocol)</li> <li>• Analysis (appropriate, complete, methods detailed)</li> <li>• Sample size</li> </ul>                                                                                                                                                                                                                                                      |
| <b>Special studies (quantitative)</b>          | <ul style="list-style-type: none"> <li>• Representativeness of sample (probability based?)</li> <li>• Implementation (methods implemented according to protocol)</li> <li>• Strength of the measures (biomarkers, detailed behavioral indicators, knowledge)</li> <li>• Analysis (appropriate, complete, methods detailed)</li> <li>• Sample size</li> <li>• Response rate</li> </ul>                                                                                                                                                                                  |
